# Supplementary material
Source: PubMed Central journal article supplement (PMC9135475)

Fig S7

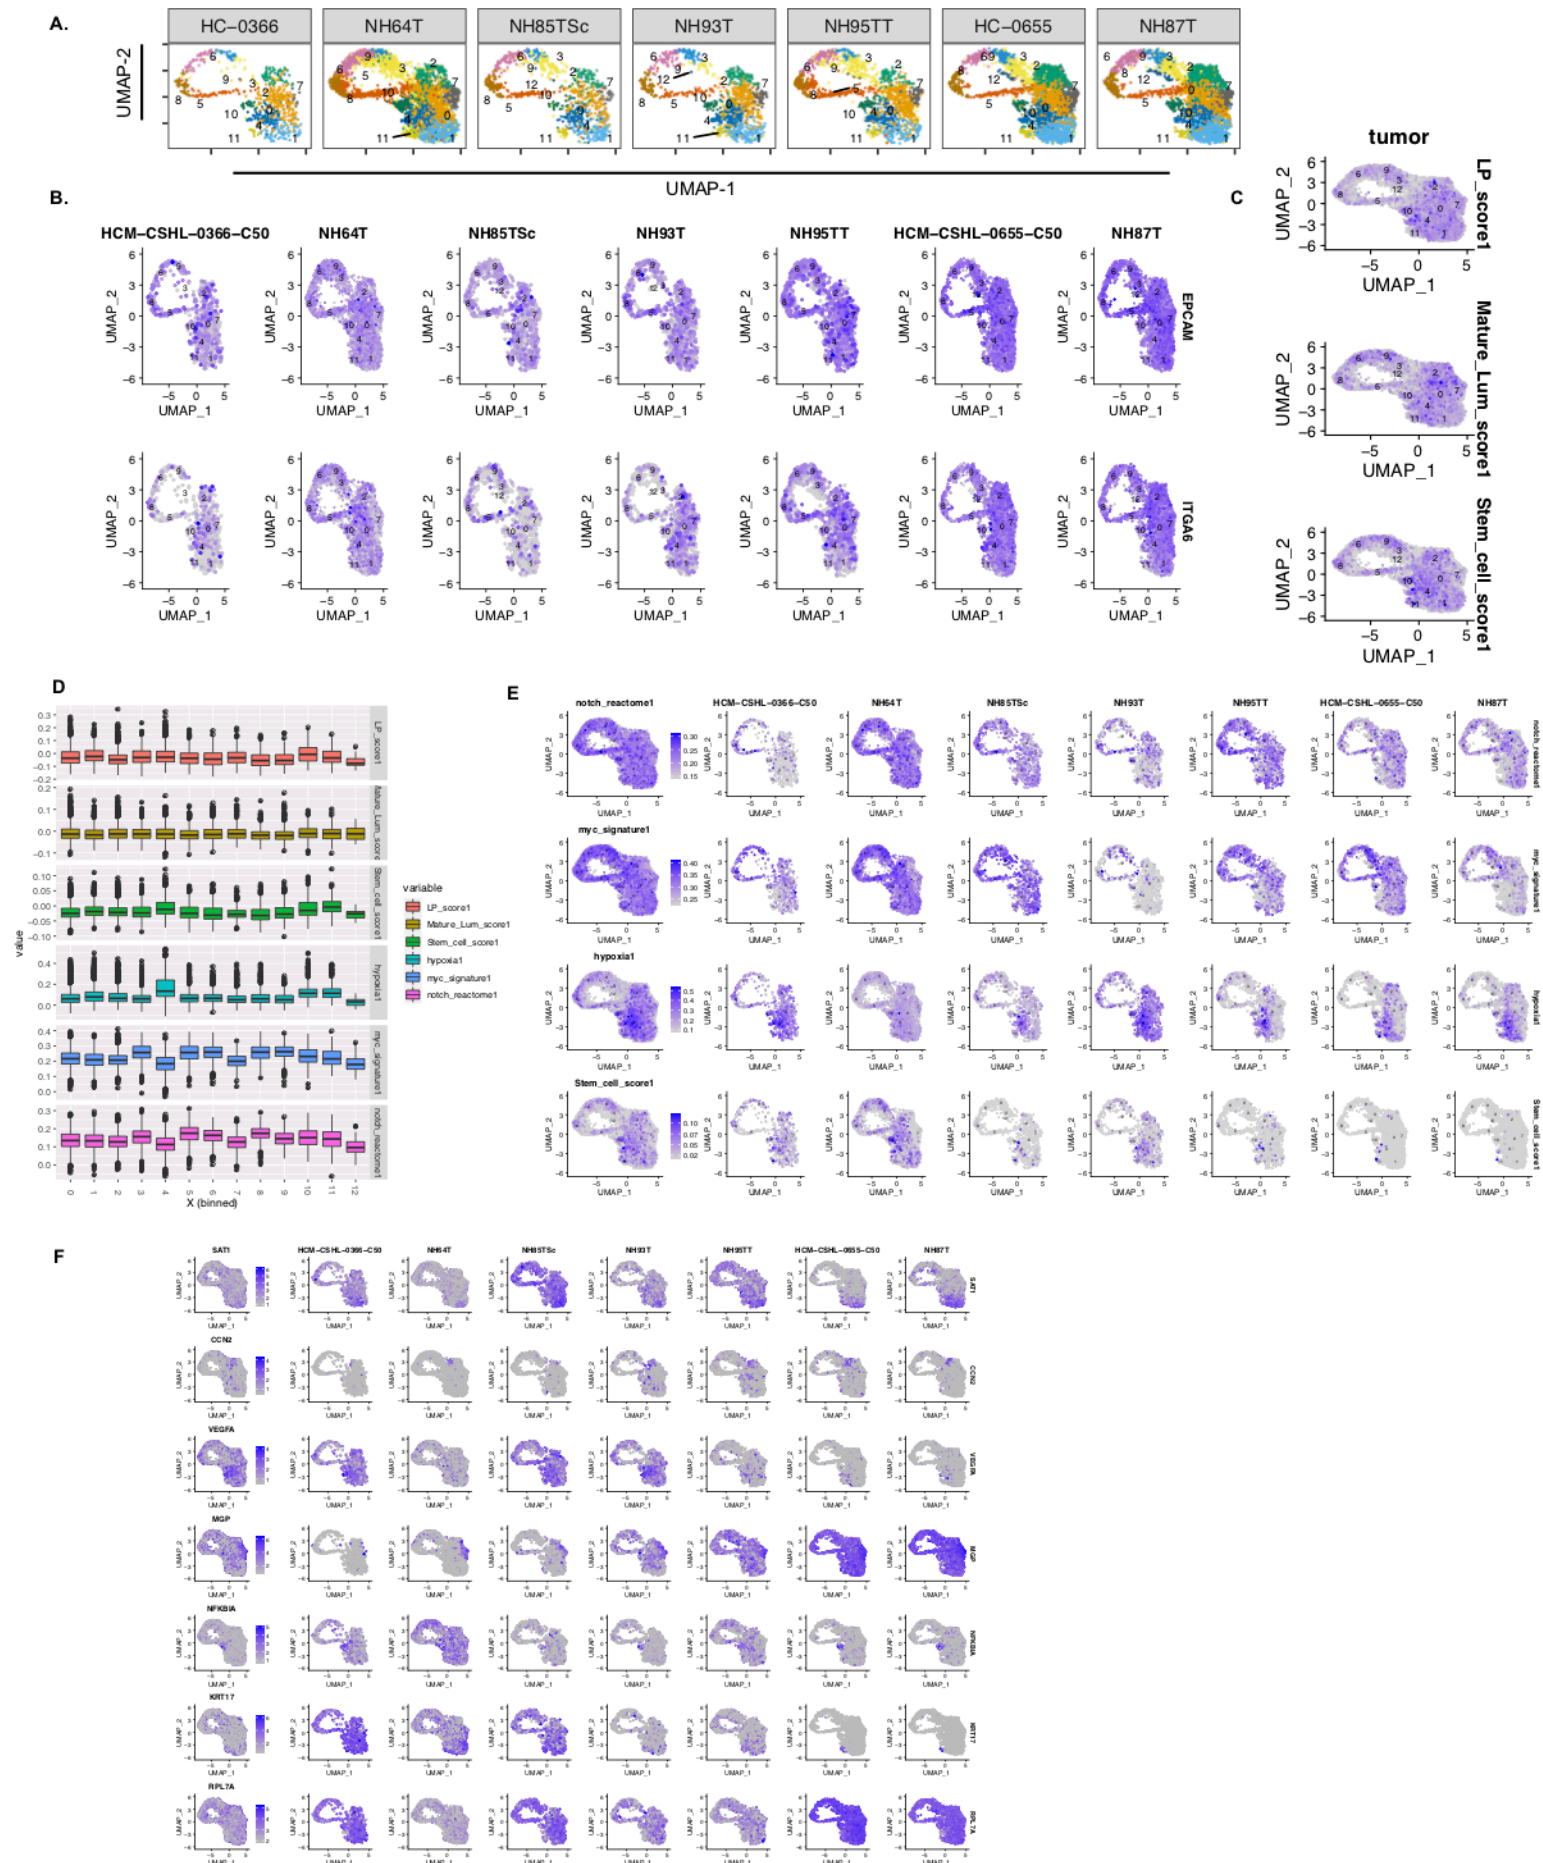

Supplement: NIHMS1799657-supplement-Revised_fig_S7.pdf [file NIHMS1799657-supplement-Revised_fig_S7.pdf]
